# Supplementary material for: Chromosomal copy number analysis of products of conception by conventional karyotyping and next‐generation sequencing
Source: PubMed Central journal article supplement (PMC7812460; doi:10.1002/rmb2.12351), 2020-10-08
Supplement: RMB2-20-71-s003.pdf [file RMB2-20-71-s003.pdf]

Table S1. Chromosome structural information of duplication/deletion cases.

| <b>Case No.</b> | <b>Copy number variations (CNVs)</b>   | <b>Size</b>     |
|-----------------|----------------------------------------|-----------------|
| 1               | dup(1)(q12q44), del(4)(p16.3p15.32)    | 115.7Mb, 15.6Mb |
| 2               | dup(7)(p22.3q11.21)                    | 6.5Mb           |
| 3               | del(5)(p15.33p15.1), dup(5)(p15.1p11)  | 1.7Mb, 29.8Mb   |
| 4               | dup(3)(p12.3q29)                       | 119.2Mb         |
| 5               | del(11)(q13.4q23.2)                    | 38.3Mb          |
| 6               | dup(21)(p11.1q21.1)                    | 2.3Mb           |
| 7               | del(8)(p23.3p11.23)                    | 3.7Mb           |
| 8               | dup(4)(q31.3q34.1), del(4)(q34.1q35.2) | 21.0Mb, 17.2Mb  |

Chromosome structural information (CNVs and size) of eight duplication/deletion cases are demonstrated.
